# Supplementary material for: Microbial Diversity and Community Composition of Duodenum Microbiota of High and Low Egg-Yielding Taihang Chickens Identified Using 16S rRNA Amplicon Sequencing
Source: MDPI journal article supplement (doi:10.3390/life12081262), 2022-08-18
Supplement: s1 [file s1]

**Table S1.** Summary statistics of sequences analyzed.

| Sample Name    | Raw Reads(#)  | Clean Reads(#) | Base(nt)          | Avglen(nt)    | Q20          | GC%          | Effective%  |
|----------------|---------------|----------------|-------------------|---------------|--------------|--------------|-------------|
| H.D.1          | 60,160        | 58,086         | 14,725,532        | 253           | 80.75        | 52.41        | 96.55       |
| H.D.2          | 52,765        | 51,143         | 12,976,470        | 253           | 80.94        | 52.91        | 96.93       |
| H.D.3          | 83,313        | 80,047         | 20,311,059        | 253           | 88.19        | 52.39        | 96.08       |
| H.D.4          | 53,343        | 51,668         | 13,129,322        | 254           | 82.31        | 51.7         | 96.86       |
| H.D.5          | 56,944        | 55,133         | 14,019,357        | 254           | 78.83        | 52.13        | 96.82       |
| H.D.6          | 59,696        | 57,769         | 14,704,966        | 254           | 79.66        | 51.77        | 96.77       |
| H.D.7          | 76,272        | 74,361         | 18,951,190        | 254           | 80.28        | 52.47        | 97.49       |
| H.D.8          | 85,163        | 80,082         | 20,351,199        | 254           | 80.5         | 52.37        | 94.03       |
| H.D.9          | 70,676        | 67,299         | 17,064,165        | 253           | 83.58        | 52.54        | 95.22       |
| H.D.10         | 87,071        | 84,185         | 21,390,156        | 254           | 81.98        | 51.53        | 96.69       |
| L.D.1          | 64,293        | 61,722         | 15,635,554        | 253           | 84.15        | 51.87        | 96          |
| L.D.2          | 77,608        | 74,353         | 18,892,663        | 254           | 80.91        | 51.45        | 95.81       |
| L.D.3          | 56,145        | 54,010         | 13,760,323        | 254           | 74.75        | 52.36        | 96.2        |
| L.D.4          | 84,132        | 80,115         | 20,421,431        | 254           | 81           | 51.27        | 95.23       |
| L.D.5          | 81,747        | 78,534         | 19,899,191        | 253           | 89.38        | 51.89        | 96.07       |
| L.D.6          | 82,871        | 80,041         | 20,376,974        | 254           | 82.33        | 51.93        | 96.59       |
| L.D.7          | 82,828        | 80,074         | 20,340,505        | 254           | 83.94        | 51.17        | 96.68       |
| L.D.8          | 78,228        | 75,907         | 19,370,433        | 255           | 79.75        | 51.92        | 97.03       |
| L.D.9          | 64,348        | 62,816         | 15,924,844        | 253           | 85.18        | 53.48        | 97.62       |
| L.D.10         | 56,683        | 53,996         | 13,678,740        | 253           | 86.26        | 52.97        | 95.26       |
| <b>Average</b> | <b>70,714</b> | <b>68,067</b>  | <b>17,296,204</b> | <b>253.65</b> | <b>82.23</b> | <b>52.13</b> | <b>96.3</b> |

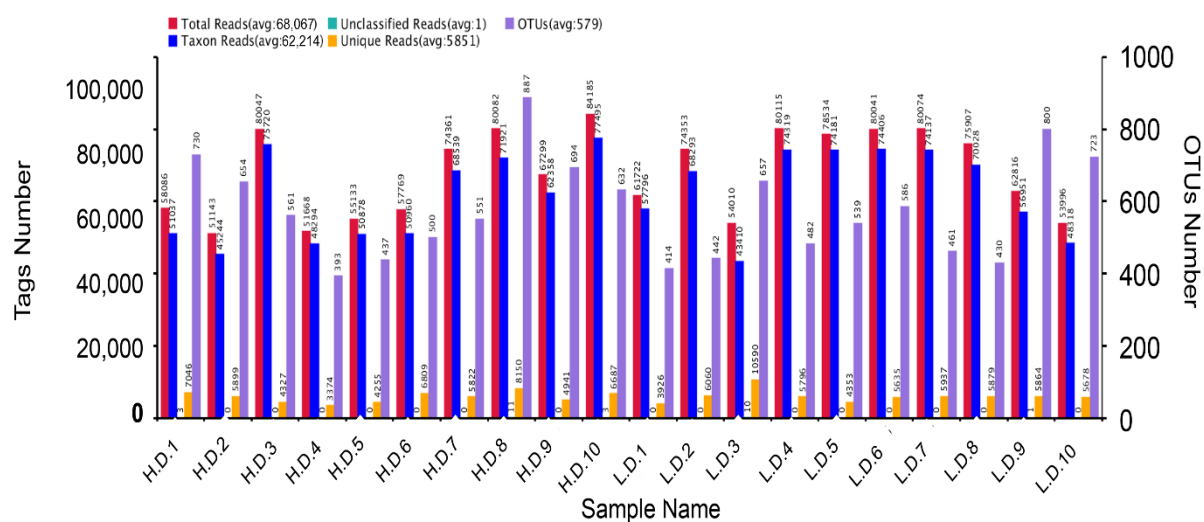

**Figure S1.** The detail sequence reads among samples.
